# Supplementary material for: Low renal but high extrarenal phenotype variability in Schimke immuno-osseous dysplasia
Source: PubMed Central journal article supplement (PMC5552097; doi:10.1371/journal.pone.0180926), 2017-08-10

**S1 Figure. Phenotype of a patient with Schimke immunoosseous dysplasia.**

Note characteristic facial features: wide, depressed nasal bridge and a broad nasal tip; short neck and trunk with lumbar lordosis and a protruding abdomen with hyperpigmented macules.

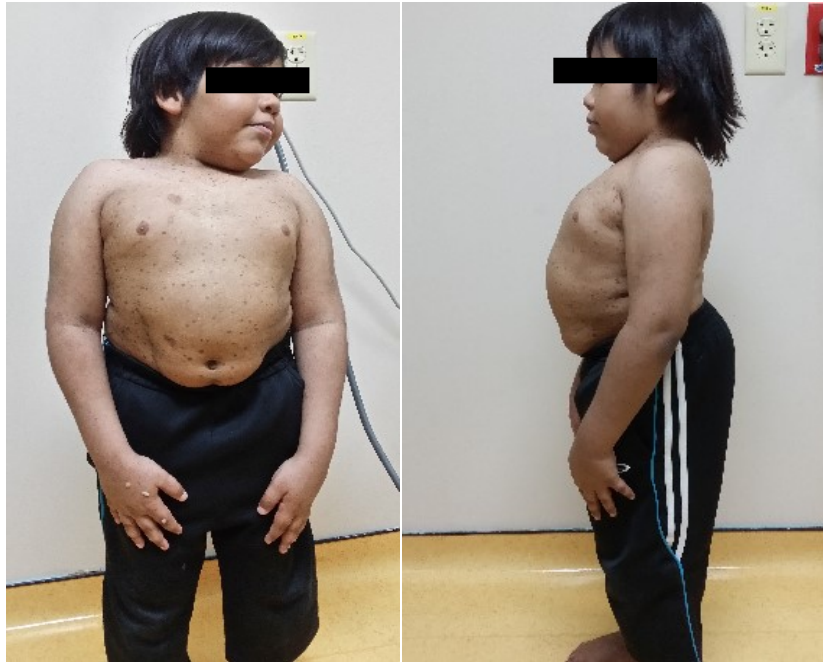

Supplement: pone.0180926.s001.pdf [file pone.0180926.s001.pdf]
