# Supplementary material for: Low renal but high extrarenal phenotype variability in Schimke immuno-osseous dysplasia
Source: PubMed Central journal article supplement (PMC5552097; doi:10.1371/journal.pone.0180926), 2017-08-10

**S-2 FIGURE.** Patient survival (left) and ESKD-free survival rate (right) of patients with Schimke immunoosseous dysplasia diagnosed with bi-allelic truncating mutations vs. patients diagnosed with bi-allelic missense mutations. Patients who deceased before reaching ESKD were censored in the renal survival analysis.

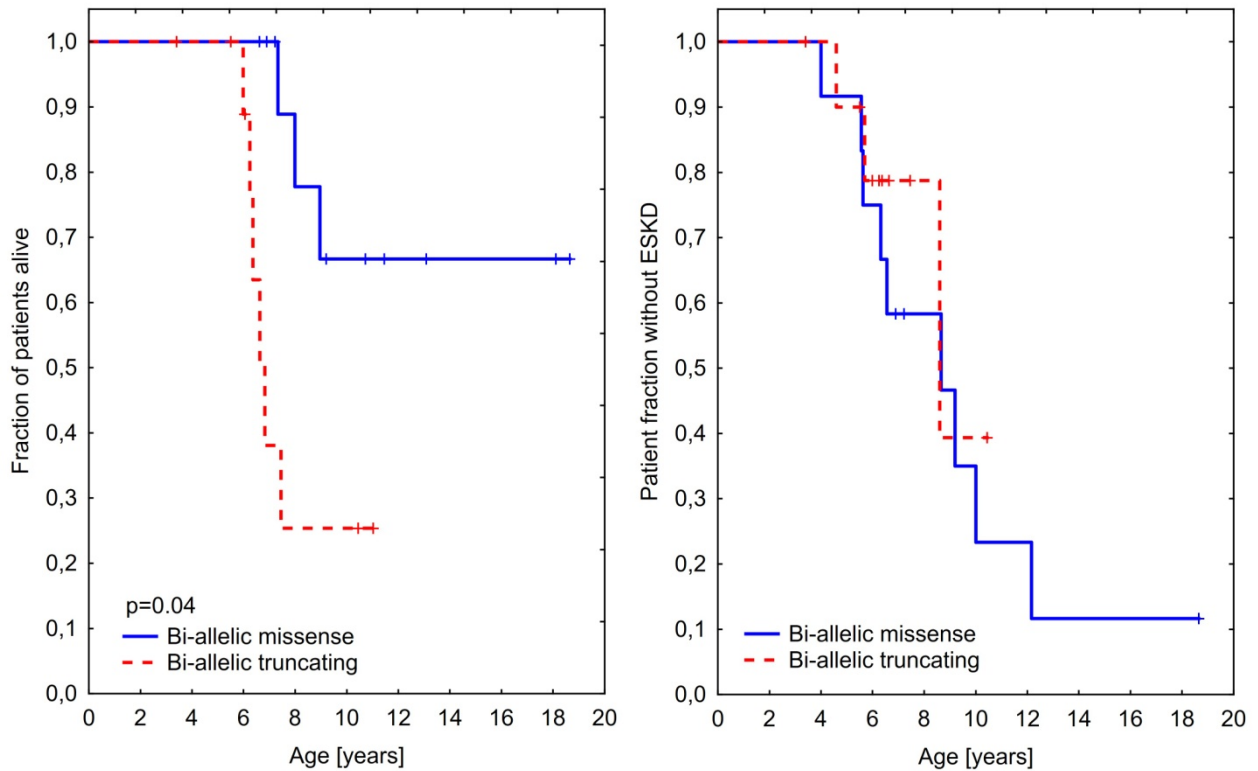

Supplement: pone.0180926.s002.pdf [file pone.0180926.s002.pdf]
