# Supplementary material for: Low renal but high extrarenal phenotype variability in Schimke immuno-osseous dysplasia
Source: PubMed Central journal article supplement (PMC5552097; doi:10.1371/journal.pone.0180926), 2017-08-10
Supplement: pone.0180926.s003.pdf [file pone.0180926.s003.pdf]

**S1 Table. Clinical characteristics of the 34 patients with bi-allelic mutations in the *SMARCA1* gene.**

| Family ID<br>(reference<br>if already<br>published) | Mutation(s)                                                | Diagnosis          | Gender | Country of<br>origin | Age at 1st<br>manifestation<br>(years) | Initial<br>proteinuria<br>ml/min/1.73m <sup>2</sup> | Initial<br>GFR | Histopathology               | Age at<br>ESRD<br>(years) | Age at last<br>observation<br>(years) | Response to<br>immunosuppres-<br>ive treatment                                         | Neurological signs<br>and symptoms                                           | Infections,<br>immunodeficiency,<br>autoimmune<br>diseases ,lympho-<br>proliferative disorders | Other extra-renal signs                                                                                                                     | Thyroid<br>function        | Height<br>at 1 <sup>st</sup><br>manifestation<br>(SD) | Height at last<br>observation<br>(SD) |
|-----------------------------------------------------|------------------------------------------------------------|--------------------|--------|----------------------|----------------------------------------|-----------------------------------------------------|----------------|------------------------------|---------------------------|---------------------------------------|----------------------------------------------------------------------------------------|------------------------------------------------------------------------------|------------------------------------------------------------------------------------------------|---------------------------------------------------------------------------------------------------------------------------------------------|----------------------------|-------------------------------------------------------|---------------------------------------|
| 1                                                   | c.49C>T<br>(p.Arg17*)<br>hom.                              | phenotype          | F      | Germany              | n/a                                    | 0.3g/dl                                             | 113            | n/a                          | —                         | 7.45<br>(death)                       | n/a                                                                                    | TIAs, migraine,<br>multiple ischemic<br>strokes, secondary<br>focal seizures | —                                                                                              | developmental and speech delay,<br>multiple pigmented nevi, malposition<br>of teeth, IUGR                                                   | normal                     | n/a                                                   | -9.7                                  |
| 2                                                   | c.49C>T<br>(p.Arg17*)<br><br>c.836T>C<br>(p.Phe279Ser)     | SRNS-gene<br>panel | F      | Germany              | 9.5                                    | 14.1 g/g uPCr                                       | 93             | collapsing<br>FSGS           | 11.7                      | 15.9                                  | no response<br>to steroids,<br>MMF,<br><i>Rituximab</i>                                | isolated high-<br>frequency hearing<br>loss                                  | low CD4-helper                                                                                 | neonatal asphyxia resulting in<br>developmental and speech delay,<br>mild/moderate ID, IUGR, preterm<br>delivery                            | hypo-<br>thyroidism        | -3.4                                                  | -5.0                                  |
| 3                                                   | c.298A>T<br>(p.Lys100*)<br><br>c.2114C>T<br>(p.Thr705Ile)  | phenotype          | F      | Germany              | 7.2                                    | 4.9g/m <sup>2</sup> /day                            | 189            | FSGS                         | 11.8                      | 16.0                                  | no response<br>to steroids,<br>CsA, CP,MMF,<br><i>Tacrolimus</i> ,<br><i>Rituximab</i> | —                                                                            | T-cell deficiency                                                                              | restrictive lung disease, multiple<br>pigmented nevi, IUGR, preterm<br>delivery                                                             | normal                     | -2.9                                                  | -3.9                                  |
| 4-I                                                 | c.836T>C<br>(p.Phe279Ser)<br><br>c.2542G>T<br>(p.Glu848*)  | phenotype          | M      | Germany              | 13.0                                   | n/a                                                 | 12             | n/a                          | 15.3                      | 34.1                                  | not treated with<br>steroids/CsA/other                                                 | —                                                                            | n/a                                                                                            | —                                                                                                                                           | normal                     | n/a                                                   | -1.8                                  |
| 4-II                                                | c.836T>C<br>(p.Phe279Ser)<br><br>c.2542G>T<br>(p.Glu848*)  | phenotype          | M      | Germany              | 12.4                                   | 2 g/day                                             | 75             | FSGS                         | 18.5                      | 31.2                                  | not treated with<br>steroids/CsA/other                                                 | TIAs, multiple ischemic<br>strokes, secondary<br>seizures                    | lymphopenia, low CD4, CD8                                                                      | restrictive lung disease, IUGR,<br>preterm delivery<br><br>factor V (Leiden) mutation                                                       | hypo-<br>thyroidism        | -2.7                                                  | -5.8                                  |
| 5-I                                                 | c.836T>C<br>(p.Phe279Ser)<br><br>c.2542G>T<br>(p.Glu848*)  | SRNS-gene<br>panel | F      | Poland               | 4.8                                    | 3.2 g/day                                           | 119            | minimal<br>change<br>disease | 8.7                       | 9.1                                   | no response to<br>steroids<br><br>transient<br>response to<br>CsA                      | TIAs, migraine                                                               | frequent respiratory<br>infections;<br><br>low CD4-helper                                      | Painful muscle contractions and<br>creatinine kinase serum levels<br>>2,000 IU/l during infection;<br>IUGR, preterm delivery                | latent hypo-<br>thyroidism | -2.6                                                  | -4.5                                  |
| 6<br>(ref.5;13)                                     | c.1026C>A<br>(p.Tyr342*)<br><br>c.2264T>G<br>(p.Ile755Ser) | phenotype          | M      | Italy                | 3.6                                    | n/a                                                 | 47             | collapsing FSGS              | 3.8                       | 4.6<br>(death)                        | no response<br>to<br>steroids/CsA                                                      | TIAs, secondary seizures,<br>lower extremity<br>hypotonia                    | sepsis, persistent diarrhea,<br><br>lymphopenia, low CD4, CD8                                  | moderate ID, microdontia, agenesis<br>of the 5th tooth (lower arch), solitary<br>kidney, multiple pigmented nevi,<br>IUGR, preterm delivery | n/a                        | -2.3                                                  | n/a                                   |

|              |                                                              |                    |   |           |      |                         |     |               |     |                |                                                                                 |                                                                                              |                                                                                                                            |                                                                                                                                                                                                       |                               |      |      |
|--------------|--------------------------------------------------------------|--------------------|---|-----------|------|-------------------------|-----|---------------|-----|----------------|---------------------------------------------------------------------------------|----------------------------------------------------------------------------------------------|----------------------------------------------------------------------------------------------------------------------------|-------------------------------------------------------------------------------------------------------------------------------------------------------------------------------------------------------|-------------------------------|------|------|
| 7            | c.1382G>A<br>(p.Gly461Asp)<br>hom.                           | phenotype          | M | Czech     | 4.1  | 16 g/day                | 153 | FSGS/GGS      | 5.6 | 11.5           | not treated with<br>steroids/CsA/other                                          | neonatal hypotonia                                                                           | frequent respiratory<br>infections<br><br>low CD4, CD8                                                                     | mild developmental delay,<br>malformed deciduous molars,<br>multiple pigmented nevi, IUGR                                                                                                             | normal                        | -1.9 | n/a  |
| 8<br>(ref.9) | c.1439C>T<br>(p.Pro480Leu)<br><br>c.2264T>G<br>(p.Ile755Ser) | phenotype          | F | Italy     | 4.7  | n/a                     | 107 | n/a           | 6.3 | 9.0<br>(death) | no response to<br>steroids, CsA                                                 | —                                                                                            | catheter-related sepsis,<br>pulmonary Aspergillosis<br>ITP<br>lymphopenia, low IgG                                         | restrictive lung disease,<br>developmental delay,mild ID,<br>microdontia, IUGR, preterm delivery                                                                                                      | hypo-<br>thyroidism           | -3.6 | -5.4 |
| 9<br>(ref.6) | c.1439C>T<br>(p.Pro480Leu)<br><br>c.2542G>T<br>(p.Glu848*)   | phenotype          | F | Czech     | 2.2  | 1-2 g/m <sup>2</sup> /d | 114 | FSGS/GGS      | —   | 5.7<br>(death) | not treated with<br>steroids/CsA/other                                          | TIAs, multiple ischemic<br>strokes, secondary<br>seizures, triplegia with<br>motoric aphasia | fungal sepsis<br><br>self-limited neonatal<br>thrombocytopenia;<br>Evans syndrome (age 5yrs)<br><br>low CD4, CD8           | mild developmental delay,<br>multiple pigmented nevi, IUGR                                                                                                                                            | normal                        | -4.2 | -7.4 |
| 10           | c.1681C>T<br>(p.Arg561Cys)<br>hom.                           | SRNS-gene<br>panel | F | Turkey    | 17.2 | 2.1 g/day               | 81  | FSGS          | —   | 18.6           | no response<br>to steroids,<br>Rituximab<br><br>partial response<br>to CsA      | —                                                                                            | —                                                                                                                          | —                                                                                                                                                                                                     | normal                        | -4.2 | -4.1 |
| 11           | c.1736C>A<br>(p.Ser579*)<br>hom.                             | phenotype          | M | Lebanon   | 4.1  | 28g/g uPCr              | 59  | FSGS          | —   | 6.6<br>(death) | no response<br>to steroids<br><br>partial response<br>to CsA                    | TIAs, multiple ischemic<br>strokes, secondary<br>seizures, hemiparesis                       | frequent respiratory infections<br><br>PTLD of the colon (EBV assoc.)<br>non Hodgkin B-cell lymphoma<br><br>low CD4-helper | mild developmental delay,<br>moderate ID; ASD-II; PFO,<br>dystopia of the right kidney,<br>bilateral hernia inguinalis, IUGR,<br>preterm delivery<br><br>t-PA deficiency and elevated PAI-I<br>(hom.) | hypo-<br>thyroidism           | -4.5 | -6.3 |
| 12-I         | c.1736C>A<br>(p.Ser579*)<br>hom.                             | phenotype          | F | Lebanon   | 4.0  | 18.3g/g uPCr            | 145 | FSGS          | 5.7 | 6.8<br>(death) | no response<br>to steroids<br><br>partial response<br>to CsA, <i>Tacrolimus</i> | —                                                                                            | PTLD of the CNS and lung<br>(EBV assoc.) non Hodgkin B-cell<br>lymphoma<br><br>T-cell deficiency                           | restrictive lung disease requiring<br>O <sub>2</sub> therapy; ASD, PFO, IUGR,<br>preterm delivery                                                                                                     | hypo-<br>thyroidism           | -4.8 | -6.0 |
| 12-II        | c.1736C>A<br>(p.Ser579*)<br>hom.                             | phenotype          | M | Lebanon   | 3.0  | 3.4g/g uPCr             | 107 | not performed | —   | 6.3<br>(death) | no response to<br>steroids<br><br>partial response<br>to <i>Tacrolimus</i>      | —                                                                                            | frequent respiratory infections<br><br>low CD4, CD8                                                                        | restrictive lung disease requiring<br>O <sub>2</sub> therapy; multiple pigmented<br>nevi, IUGR                                                                                                        | hypo-<br>thyroidism           | -5.5 | -7.4 |
| 13           | c.1739G>T<br>(p.Gly580Val)<br><br>c.2423C>G<br>(p.Pro808Arg) | phenotype          | M | Macedonia | 2.8  | +++ (dipstick)          | 68  | not performed | 4.0 | 7.3<br>(death) | not treated with<br>steroids/CsA/other                                          | periventricular white<br>matter defects,<br>secondary seizures,                              | frequent respiratory infections<br><br>mild leukopenia                                                                     | microdontia, mild developmental<br>delay, no perinatal data                                                                                                                                           | latent<br>hypo-<br>thyroidism | -3.6 | -7.3 |

|               |                                                                                 |                    |   |         |      |             |     |                              |      |                             |                                                                   |                                                                                   |                                                                                                             |                                                                                                                                                                |                            |      |      |
|---------------|---------------------------------------------------------------------------------|--------------------|---|---------|------|-------------|-----|------------------------------|------|-----------------------------|-------------------------------------------------------------------|-----------------------------------------------------------------------------------|-------------------------------------------------------------------------------------------------------------|----------------------------------------------------------------------------------------------------------------------------------------------------------------|----------------------------|------|------|
| 14            | c.1756C>T<br>(p.Arg586Trp)<br>hom.                                              | phenotype          | M | Turkey  | 9.6  | 9.6g/g uPCR | 158 | FSGS                         | 10.0 | 18.1                        | no response to<br>steroids, CsA, CP                               | —                                                                                 | meningitis,<br>MDS susp.<br>mild leucopenia, low CD4                                                        | post-transplant BK virus<br>associated nephropathy<br>(BKVAN); multiple pigmented<br>nevi, IUGR                                                                | normal                     | -3.7 | -6.9 |
| 15<br>(ref.8) | c.1859G>A<br>(p.Trp620*)<br><br>c.2542G>T<br>(p.Glu848*)                        | phenotype          | M | Poland  | 4.4  | 9.1g/day    | 91  | hilar FSGS                   | 8.6  | 11.2                        | no response to<br>steroids, CsA<br><br>partial response<br>to MMF | —                                                                                 | frequent respiratory<br>infections<br><br>post-transplant ITP<br>mild leucopenia, low CD4,<br>CD8, CD3, IgG | multiple pigmented nevi, IUGR,<br>preterm delivery                                                                                                             | normal                     | -2.0 | -4.9 |
| 16            | c.1931G>A<br>(p.Arg644Gln)<br><br>c.2542G>T<br>(p.Glu848*)                      | SRNS-gene<br>panel | M | Poland  | 3.2  | 0.16g/day   | 206 | minimal<br>change<br>disease | —    | 8.3                         | no response to<br>steroids<br><br>partial response<br>to CsA      | —                                                                                 | mild leucopenia, low CD4                                                                                    | microdontia, delayed permanent<br>teething, multiple pigmented<br>nevi, IUGR                                                                                   | n/a                        | 0.3  | -1.6 |
| 17            | c.1933C>G<br>(p.Arg645Gly)<br><br>c.2425G>A<br>(p.Gly809Arg)                    | phenotype          | M | France  | 10.8 | n/a         | <60 | FSGS                         | 12.2 | 13.1                        | no response to<br>steroids, CsA,<br><i>Tacrolimus</i>             | ischemic stroke,<br>demyelinating<br>peripheral neuropathy,<br>epilepsy (absence) | catheter-related sepsis<br><br>SCID                                                                         | femoral head necrosis, multiple<br>pigmented nevi, IUGR, preterm<br>delivery                                                                                   | normal                     | n/a  | -3.7 |
| 18            | c.1940A>C<br>(p.Lys647Thr)<br>hom.                                              | SRNS-gene<br>panel | F | Morocco | 5.7  | 6.3g/g uPCR | 128 | minimal<br>change<br>disease | —    | 6.7                         | no response to<br>steroids,<br>CsA MMF,                           | migraine-like headaches,<br>possible episode of TIA,<br>epilepsy (absence)        | mild leucopenia, low CD4,<br>CD8                                                                            | severe photophobia, macular<br>opacities, IUGR                                                                                                                 | normal                     | -2.2 | -2.8 |
| 19            | c.1940A>C<br>(p.Lys647Thr)<br>hom.                                              | SRNS-gene<br>panel | F | Algeria | 5.3  | 1.4g/day    | ~60 | collapsing FSGS              | 5.6  | 6.6                         | no response to<br>steroids;<br>no CsA/other<br>treatment          | —                                                                                 | mild leucopenia,<br>lymphocyte subpopulation<br>tests not performed                                         | chronic vomiting and diarrhea,<br>IUGR                                                                                                                         | normal                     | n/a  | -4.4 |
| 20-I          | c.2070+2insT<br><br>c. 2462T>G<br>(p.Ile821Ser)                                 | phenotype          | M | France  | 3.4  | n/a         | n/a | FSGS                         | 5.7  | 9.8<br>(death)              | no response to<br>steroids<br><br>partial response<br>to CsA      | TIAs, secondary seizures                                                          | frequent respiratory infections<br><br>mild leucopenia,<br>lymphopenia, low IgG                             | restrictive lung disease requiring<br>O <sub>2</sub> therapy during infections;<br>multiple pigmented nevi,<br>malposition of teeth, IUGR,<br>preterm delivery | hypo-<br>thyroidism        | -2.1 | -4.7 |
| 20-II         | c.2070+2insT<br><br>c. 2462T>G<br>(p.Ile821Ser)                                 | phenotype          | M | France  | 3.2  | 0.7g/l      | 105 | minimal<br>change<br>disease | 6.2  | 8.0<br>(death at<br>10 yrs) | no response to<br>steroids<br><br>partial response<br>to CsA      | TIAs, ischemic stroke,<br>secondary seizures,<br>hemiplegia                       | frequent respiratory infections<br><br>SCID                                                                 | hypertrophic and dilated<br>cardiomyopathy with acute and<br>transient heart failure (age 6yrs)<br>multiple pigmented nevi, IUGR,<br>preterm delivery          | normal                     | -2.0 | -5.0 |
| 21            | c.2149_2150dupATphenotype<br>(p.Leu718Serfs*13)<br><br>c.2542G>T<br>(p.Glu848*) | phenotype          | M | Germany | 2.1  | 8.2g/g uPCR | 112 | minimal<br>change<br>disease | —    | 3.4                         | no response to<br>steroids, CsA                                   | —                                                                                 | n/a<br><br>low CD4                                                                                          | photophobia, multiple pigmented<br>nevi, IUGR, preterm delivery                                                                                                | latent hypo-<br>thyroidism | -2.4 | -4.3 |

|               |                                                            |                     |   |                          |     |                      |     |               |     |                |                                        |                                                            |                                                                                            |                                                                                                                   |                               |      |      |
|---------------|------------------------------------------------------------|---------------------|---|--------------------------|-----|----------------------|-----|---------------|-----|----------------|----------------------------------------|------------------------------------------------------------|--------------------------------------------------------------------------------------------|-------------------------------------------------------------------------------------------------------------------|-------------------------------|------|------|
| 22<br>(ref.7) | c.2207delT<br>(p.Val736Glyfs*75)<br>hom.                   | phenotype           | M | Saudi Arabia<br>(Yamani) | 6.8 | 7.4g/l               | 129 | FSGS          | —   | 10.4           | no response to<br>steroids, CsA, CP    | —                                                          | frequent respiratory infections                                                            | loose, fragile, and yellow-stained<br>primary teeth, polyhydramnion,<br>IUGR                                      | hypo-<br>thyroidism           | -5.3 | n/a  |
| 23            | c.2244+5 G>A<br>hom.                                       | phenotype           | M | United<br>Kingdom        | 4.5 | n/a                  | n/a | not performed | —   | 5.5            | not treated with<br>steroids/CsA/other | n/a                                                        | n/a                                                                                        | mild developmental delay,mild ID,<br>no perinatal data                                                            | n/a                           | n/a  | n/a  |
| 24-I          | c.2290C>T<br>(p.Arg764Trp)<br>hom.                         | SRNS-gene<br>panel  | M | Saudi Arabia             | 8.4 | +++ (dipstick)       | 28  | FSGS          | 8.7 | 10.7           | no response to<br>steroids, MMF        | generalized tonic-<br>clonic seizures<br>secondary to ESKD | lymphocyte subpopulation<br>tests not performed                                            | multiple pigmented nevi, IUGR                                                                                     | hypo-<br>thyroidism           | -4.6 | n/a  |
| 24-II         | c.2290C>T<br>(p.Arg764Trp)<br>hom.                         | family<br>screening | F | Saudi Arabia             | 5.1 | 4g/l                 | 180 | FSGS          | —   | 7.2            | no response to<br>steroids, CsA        | —                                                          | lymphocyte subpopulation<br>tests not performed                                            | multiple pigmented nevi, IUGR                                                                                     | latent<br>hypo-<br>thyroidism | -3.6 | -4.9 |
| 25            | c.2308C>T<br>(p.Gln770*)<br>hom.                           | phenotype           | M | Jordan                   | 4.2 | 9.3g/g uPCr          | 252 | FSGS          | —   | 6.0<br>(death) | no response to<br>steroids, MMF        | ischemic stroke,<br>migraine                               | Sepsis<br><br>low CD4                                                                      | multiple pigmented nevi,<br>clinodactyly, syndactyly of toes,<br>IUGR, preterm delivery                           | latent<br>hypo-<br>thyroidism | -5.5 | -6.6 |
| 26            | c.2542G>T<br>(p.Glu848*)<br><br>c.2459G>T<br>(p.Arg820Leu) | SRNS-gene<br>panel  | F | Poland                   | 2.6 | 3g/day               | 40  | FSGS          | 3.1 | 10.1           | no response to<br>steroids, CsA        | migraine-like<br>headaches, focal<br>seizures              | acute disseminated<br>encephalomyelitis (ADEM)<br><br>no meningitis<br><br>mild leucopenia | multiple pigmented nevi, IUGR,<br>preterm delivery                                                                | normal                        | -4.4 | -7.0 |
| 27-I          | c.2459G>A<br>(p.Arg820His)<br>hom.                         | SRNS-gene<br>panel  | M | Turkey                   | 8.2 | 'nephrotic<br>range' | 52  | FSGS          | 9.2 | 9.2            | no response to<br>steroids, CsA        | —                                                          | lymphocyte subpopulation<br>tests not performed                                            | no perinatal data                                                                                                 | normal                        | -2.9 | -3.3 |
| 27-II         | c.2459G>A<br>(p.Arg820His)<br>hom.                         | family<br>screening | F | Turkey                   | 6.1 | 1.1g/g uPCr          | 200 | FSGS/GGS      | 6.6 | 8.0<br>(death) | no response to<br>steroids, CsA        | —                                                          | frequent respiratory infections<br><br>lymphocyte subpopulation<br>tests not performed     | no perinatal data                                                                                                 | n/a                           | -4.6 | n/a  |
| 5-II          | c.2542G>T<br>(p.Glu848*)<br>hom.                           | phenotype           | M | Poland                   | 1.4 | ++ (dipstick)        | n/a | FSGS          | 4.6 | 6.1            | no response to<br>steroids, CsA        | —                                                          | frequent respiratory infections<br><br>low CD4                                             | microdontia multiple pigmented nevi,<br>oligohydramnion, IUGR, preterm<br>delivery                                | hypo-<br>thyroidism           | -0.1 | -4.7 |
| 28            | c.2542G>T<br>(p.Glu848*)<br><br>del(2)(q34-q36)            | phenotype           | F | Germany                  | 2.5 | 1.9g/g uPCr          | 165 | not performed | —   | 6.4<br>(death) | not treated with<br>steroids/CsA/other | multiple ischemic<br>strokes, secondary focal<br>seizures, | pancytopenia in infancy<br>T-cell (CD4, CD8) deficiency                                    | developmental delay,moderate ID,<br>corneal opacities, microcornea,<br>oligohydramnion, IUGR, preterm<br>delivery | normal                        | -4.5 | -7.4 |

**Legend:**

n/a – not available; hom – homozygous; M – male; F – female; uPCr – urinary protein/creatinine ratio; uAlbCr – urinary albumin/creatinine ratio; FSGS – focal segmental glomerulosclerosis; GGS – global glomerulosclerosis; ESRD – end-stage renal disease; CsA – *ciclosporin A*; MMF – *Mycophenolate mofetil*; CP – *Cyclophosphamide*; TIA – transient ischemic attack; CD – a class of glycoproteins (Cluster of Differentiation); tPA – tissue plasminogen activator; PAI-I – plasminogen activator inhibitor-1 (also known as endothelial plasminogen activator inhibitor or serpin E1); PTLD – Post-transplant lymphoproliferative disorder; CNS – central nervous system; EBV – Epstein-Barr virus; ITP – immune thrombocytopenic purpura; IgG – immunoglobulin G; MDS – myelodysplastic syndrome; SCID – severe combined immunodeficiency; IUGR – intrauterine growth retardation; ID – intellectual disability; ASD – atrial septum defect; PFO – patent foramen ovale; SD – standard deviation;
